# Supplementary material for: Multivitamin Use and Mortality Risk in 3 Prospective US Cohorts
Source: PubMed Central journal article supplement (PMC11208972; doi:10.1001/jamanetworkopen.2024.18729), 2024-06-26
Supplement: jamanetwopen-e2418729-s001.pdf [file jamanetwopen-e2418729-s001.pdf]

## Supplemental Online Content

Loftfield E, O'Connell CP, Abnet CC, et al. Multivitamin use and mortality risk in 3 prospective US cohorts. *JAMA Netw Open*. 2024;7(6):e2418729. doi:10.1001/jamanetworkopen.2024.18729

**eFigure 1.** Flowchart for Final Analytic Sample

**eTable 1.** Baseline Characteristics of Study Participants by Cohort, According to Multivitamin Use

**eTable 2.** Study-Specific Hazard Ratios Between Multivitamin Use and Mortality

**eFigure 2.** Forest Plot of Stratified Baseline Estimates for the Association of Nondaily Multivitamin Use and All-Cause Mortality

**eTable 3.** Baseline Characteristics of Time-Varying Analysis Participants by Cohort, According to Multivitamin Use

This supplemental material has been provided by the authors to give readers additional information about their work.

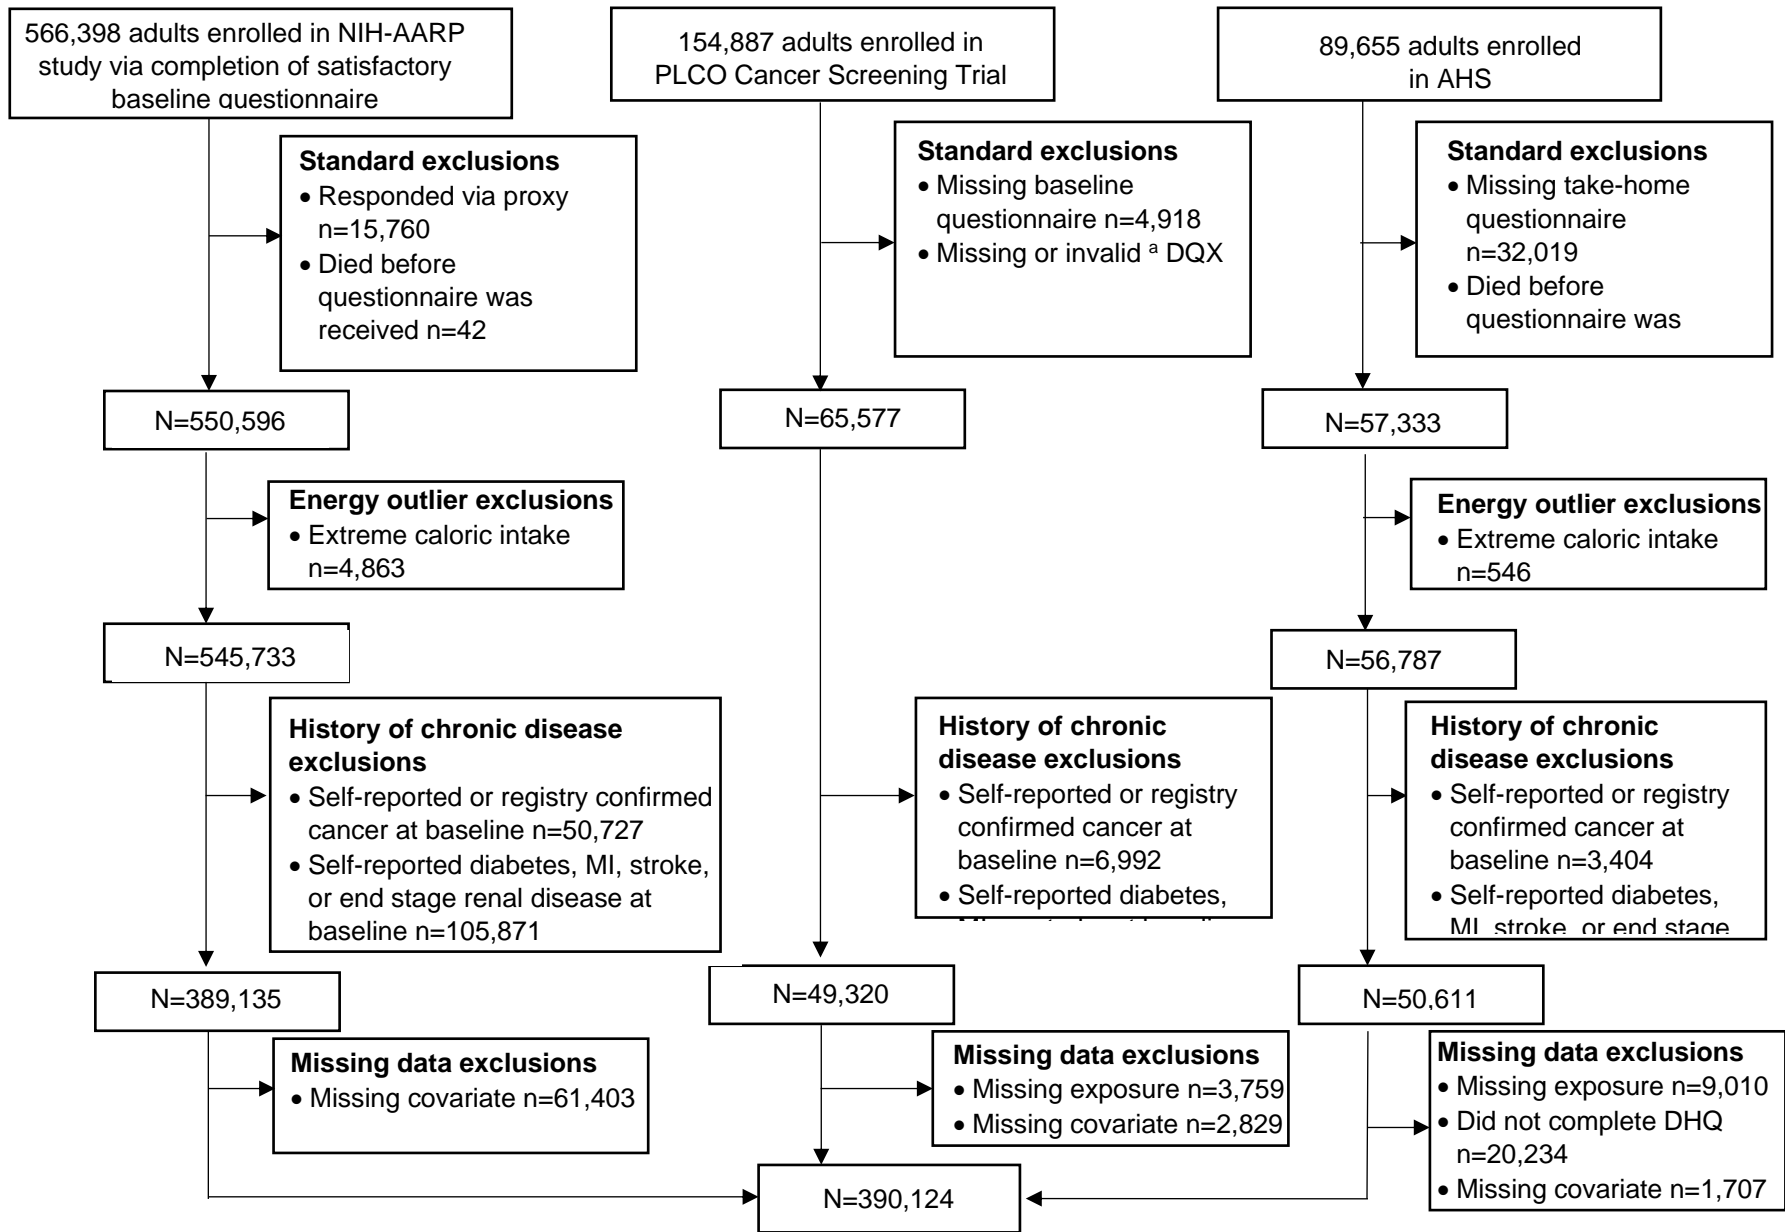

## eFigure 1. Flowchart for final analytic sample

<sup>a</sup> A Dietary Questionnaire (DQX) was considered invalid if the participant died before completion, had more than 8 missing or multiple-frequency responses, had a missing completion date or had extreme calorie consumption.

**eTable 1. Baseline characteristics of study participants by cohort, according to multivitamin use**

| Characteristic, No. (%) <sup>a</sup> | Nonuse<br>N=144947 | Nondaily use<br>N=41829 | Daily use<br>N=140956 | Overall<br>N=327732 |
|--------------------------------------|--------------------|-------------------------|-----------------------|---------------------|
| AARP participants                    |                    |                         |                       |                     |
| Age, median (IQR), y                 | 62.0 (57.2 - 66.2) | 60.7 (56.2 - 65.2)      | 62.2 (57.4 - 66.3)    | 61.9 (57.2 - 66.1)  |
| Sex                                  |                    |                         |                       |                     |
| Female                               | 55143 (38.0%)      | 19723 (47.2%)           | 66615 (47.3%)         | 141481 (43.2%)      |
| Male                                 | 89804 (62.0%)      | 22106 (52.8%)           | 74341 (52.7%)         | 186251 (56.8%)      |
| Race/Ethnicity                       |                    |                         |                       |                     |
| American Indian/Alaskan Native       | 362 (0.2%)         | 114 (0.3%)              | 324 (0.2%)            | 800 (0.2%)          |
| Asian/Pacific Islander               | 1897 (1.3%)        | 729 (1.7%)              | 1832 (1.3%)           | 4458 (1.4%)         |
| Hispanic                             | 2601 (1.8%)        | 855 (2.0%)              | 2371 (1.7%)           | 5827 (1.8%)         |
| Non-Hispanic Black                   | 5101 (3.5%)        | 1843 (4.4%)             | 3931 (2.8%)           | 10875 (3.3%)        |
| Non-Hispanic White                   | 134986 (93.1%)     | 38288 (91.5%)           | 132498 (94.0%)        | 305772 (93.3%)      |
| Education                            |                    |                         |                       |                     |
| less than 8 years, 8-11 years        | 8612 (5.9%)        | 1731 (4.1%)             | 5999 (4.3%)           | 16342 (5.0%)        |
| 12 years, completed high school, GED | 30566 (21.1%)      | 6987 (16.7%)            | 26094 (18.5%)         | 63647 (19.4%)       |
| post-high school training            | 14910 (10.3%)      | 4171 (10.0%)            | 13964 (9.9%)          | 33045 (10.1%)       |
| some college                         | 33294 (23.0%)      | 10475 (25.0%)           | 34327 (24.4%)         | 78096 (23.8%)       |
| college and postgraduate             | 57565 (39.7%)      | 18465 (44.1%)           | 60572 (43.0%)         | 136602 (41.7%)      |
| Smoking status                       |                    |                         |                       |                     |
| Never smoker                         | 54867 (37.9%)      | 16847 (40.3%)           | 54369 (38.6%)         | 126083 (38.5%)      |
| Former smoker                        | 70391 (48.6%)      | 19271 (46.1%)           | 70506 (50.0%)         | 160168 (48.9%)      |
| Current smoker                       | 19689 (13.6%)      | 5711 (13.7%)            | 16081 (11.4%)         | 41481 (12.7%)       |
| Physical activity level              |                    |                         |                       |                     |
| Never/Rarely                         | 27309 (18.8%)      | 6437 (15.4%)            | 20777 (14.7%)         | 54523 (16.6%)       |
| Low (few times a month)              | 21516 (14.8%)      | 6973 (16.7%)            | 17804 (12.6%)         | 46293 (14.1%)       |
| Moderate (few times a week)          | 32581 (22.5%)      | 10848 (25.9%)           | 30416 (21.6%)         | 73845 (22.5%)       |
| High (many times a week)             | 63541 (43.8%)      | 17571 (42.0%)           | 71959 (51.1%)         | 153071 (46.7%)      |
| Individual supplement use            | 50977 (35.2%)      | 34005 (81.3%)           | 119735 (84.9%)        | 204717 (62.5%)      |
| BMI category                         |                    |                         |                       |                     |
| < 18.5 kg/m <sup>2</sup>             | 1421 (1.0%)        | 454 (1.1%)              | 1685 (1.2%)           | 3560 (1.1%)         |
| 18.5 to < 25 kg/m <sup>2</sup>       | 49798 (34.4%)      | 15558 (37.2%)           | 56361 (40.0%)         | 121717 (37.1%)      |
| 25 to < 30 kg/m <sup>2</sup>         | 63020 (43.5%)      | 17639 (42.2%)           | 58095 (41.2%)         | 138754 (42.3%)      |
| ≥ 30 kg/m <sup>2</sup>               | 30708 (21.2%)      | 8178 (19.6%)            | 24815 (17.6%)         | 63701 (19.4%)       |
| Alcohol category                     |                    |                         |                       |                     |
| 0 drinks per day                     | 32001 (22.1%)      | 7829 (18.7%)            | 30147 (21.4%)         | 69977 (21.4%)       |
| Less than 1 drink per day            | 76670 (52.9%)      | 24509 (58.6%)           | 77338 (54.9%)         | 178517 (54.5%)      |
| 1-2 drinks per day                   | 18147 (12.5%)      | 4988 (11.9%)            | 17730 (12.6%)         | 40865 (12.5%)       |
| 2-3 drinks per day                   | 5755 (4.0%)        | 1510 (3.6%)             | 5535 (3.9%)           | 12800 (3.9%)        |
| 3 or more drinks per day             | 12374 (8.5%)       | 2993 (7.2%)             | 10206 (7.2%)          | 25573 (7.8%)        |
| Coffee intake                        |                    |                         |                       |                     |
| None                                 | 15380 (10.6%)      | 3920 (9.4%)             | 15509 (11.0%)         | 34809 (10.6%)       |
| Less than 1 cup per day              | 21837 (15.1%)      | 7065 (16.9%)            | 23029 (16.3%)         | 51931 (15.8%)       |
| 1 cup per day                        | 22996 (15.9%)      | 6190 (14.8%)            | 23186 (16.4%)         | 52372 (16.0%)       |
| 2-3 cups per day                     | 60156 (41.5%)      | 17598 (42.1%)           | 57639 (40.9%)         | 135393 (41.3%)      |
| 4-5 cups per day                     | 18685 (12.9%)      | 5444 (13.0%)            | 16650 (11.8%)         | 40779 (12.4%)       |
| 6 or more cups per day               | 5893 (4.1%)        | 1612 (3.9%)             | 4943 (3.5%)           | 12448 (3.8%)        |

**eTable 1. Baseline characteristics of study participants by cohort, according to multivitamin use (continued)**

| Characteristic, No. (%) <sup>a</sup> | Nonuse             | Nondaily use       | Daily use          | Overall            |
|--------------------------------------|--------------------|--------------------|--------------------|--------------------|
| HEI-2015 quartile                    |                    |                    |                    |                    |
| Quartile 1                           | 43563 (30.1%)      | 10502 (25.1%)      | 29369 (20.8%)      | 83434 (25.5%)      |
| Quartile 2                           | 37355 (25.8%)      | 10834 (25.9%)      | 33620 (23.9%)      | 81809 (25.0%)      |
| Quartile 3                           | 33827 (23.3%)      | 10601 (25.3%)      | 36995 (26.2%)      | 81423 (24.8%)      |
| Quartile 4                           | 30202 (20.8%)      | 9892 (23.6%)       | 40972 (29.1%)      | 81066 (24.7%)      |
| Marital status                       |                    |                    |                    |                    |
| Married or living as married         | 104174 (71.9%)     | 27806 (66.5%)      | 92912 (65.9%)      | 224892 (68.6%)     |
| Divorced or separated                | 19786 (13.7%)      | 7658 (18.3%)       | 24134 (17.1%)      | 51578 (15.7%)      |
| Widowed                              | 14059 (9.7%)       | 4353 (10.4%)       | 16555 (11.7%)      | 34967 (10.7%)      |
| Never married                        | 6928 (4.8%)        | 2012 (4.8%)        | 7355 (5.2%)        | 16295 (5.0%)       |
| Family history of cancer             | 74673 (51.5%)      | 21758 (52.0%)      | 73402 (52.1%)      | 169833 (51.8%)     |
| Type of multivitamin                 |                    |                    |                    |                    |
| Stress- tab/B-complex/Other type     | 0 (0%)             | 2822 (6.7%)        | 6239 (4.4%)        | 9061 (2.8%)        |
| Therapeutic or Theragran type        | 0 (0%)             | 5824 (13.9%)       | 21726 (15.4%)      | 27550 (8.4%)       |
| One-a-day type                       | 0 (0%)             | 30287 (72.4%)      | 95962 (68.1%)      | 126249 (38.5%)     |
| More than 1 type                     | 0 (0%)             | 2896 (6.9%)        | 17029 (12.1%)      | 19925 (6.1%)       |
| <b>PLCO participants</b>             | <b>N=19353</b>     | <b>N=4471</b>      | <b>N=18908</b>     | <b>N=42732</b>     |
| Age, median (IQR), y                 | 62.0 (58.0 - 66.0) | 61.0 (57.0 - 65.0) | 62.0 (58.0 - 66.0) | 62.0 (58.0 - 66.0) |
| Sex                                  |                    |                    |                    |                    |
| Female                               | 8187 (42.3%)       | 2503 (56.0%)       | 11414 (60.4%)      | 22104 (51.7%)      |
| Male                                 | 11166 (57.7%)      | 1968 (44.0%)       | 7494 (39.6%)       | 20628 (48.3%)      |
| Race/Ethnicity <sup>b</sup>          |                    |                    |                    |                    |
| American Indian/Alaskan Native       | 33 (0.2%)          | 13 (0.3%)          | 36 (0.2%)          | 82 (0.2%)          |
| Asian/Pacific Islander               | 599 (3.1%)         | 175 (3.9%)         | 674 (3.6%)         | 1448 (3.4%)        |
| Hispanic                             | 241 (1.2%)         | 59 (1.3%)          | 267 (1.4%)         | 567 (1.3%)         |
| Non-Hispanic Black                   | 676 (3.5%)         | 135 (3.0%)         | 500 (2.6%)         | 1311 (3.1%)        |
| Non-Hispanic White                   | 17804 (92.0%)      | 4089 (91.5%)       | 17431 (92.2%)      | 39324 (92.0%)      |
| Education                            |                    |                    |                    |                    |
| less than 8 years, 8-11 years        | 1322 (6.8%)        | 173 (3.9%)         | 949 (5.0%)         | 2444 (5.7%)        |
| 12 years, completed high school, GED | 4735 (24.5%)       | 821 (18.4%)        | 4236 (22.4%)       | 9792 (22.9%)       |
| post-high school training            | 2411 (12.5%)       | 529 (11.8%)        | 2372 (12.5%)       | 5312 (12.4%)       |
| some college                         | 3948 (20.4%)       | 991 (22.2%)        | 4176 (22.1%)       | 9115 (21.3%)       |
| college and postgraduate             | 6937 (35.8%)       | 1957 (43.8%)       | 7175 (37.9%)       | 16069 (37.6%)      |
| Smoking status                       |                    |                    |                    |                    |
| Never smoker                         | 9114 (47.1%)       | 2284 (51.1%)       | 9321 (49.3%)       | 20719 (48.5%)      |
| Former smoker                        | 8177 (42.3%)       | 1754 (39.2%)       | 7963 (42.1%)       | 17894 (41.9%)      |
| Current smoker                       | 2062 (10.7%)       | 433 (9.7%)         | 1624 (8.6%)        | 4119 (9.6%)        |
| Physical activity level              |                    |                    |                    |                    |
| Never/Rarely                         | 3245 (16.8%)       | 466 (10.4%)        | 2420 (12.8%)       | 6131 (14.3%)       |
| Low (few times a month)              | 3660 (18.9%)       | 874 (19.5%)        | 3108 (16.4%)       | 7642 (17.9%)       |
| Moderate (few times a week)          | 5366 (27.7%)       | 1358 (30.4%)       | 5387 (28.5%)       | 12111 (28.3%)      |
| High (many times a week)             | 7082 (36.6%)       | 1773 (39.7%)       | 7993 (42.3%)       | 16848 (39.4%)      |
| Individual supplement use            | 6554 (33.9%)       | 3638 (81.4%)       | 15398 (81.4%)      | 25590 (59.9%)      |

eTable 1. Baseline characteristics of study participants by cohort, according to multivitamin use (continued)

| Characteristic, No. (%) <sup>a</sup> | Nonuse             | Nondaily use       | Daily use          | Overall            |
|--------------------------------------|--------------------|--------------------|--------------------|--------------------|
| <b>BMI category</b>                  |                    |                    |                    |                    |
| < 18.5 kg/m <sup>2</sup>             | 105 (0.5%)         | 31 (0.7%)          | 159 (0.8%)         | 295 (0.7%)         |
| 18.5 to < 25 kg/m <sup>2</sup>       | 6111 (31.6%)       | 1751 (39.2%)       | 7255 (38.4%)       | 15117 (35.4%)      |
| 25 to < 30 kg/m <sup>2</sup>         | 8682 (44.9%)       | 1817 (40.6%)       | 7713 (40.8%)       | 18212 (42.6%)      |
| ≥ 30 kg/m <sup>2</sup>               | 4455 (23.0%)       | 872 (19.5%)        | 3781 (20.0%)       | 9108 (21.3%)       |
| <b>Alcohol category</b>              |                    |                    |                    |                    |
| 0 drinks per day                     | 3810 (19.7%)       | 878 (19.6%)        | 4188 (22.1%)       | 8876 (20.8%)       |
| Less than 1 drink per day            | 10369 (53.6%)      | 2553 (57.1%)       | 10511 (55.6%)      | 23433 (54.8%)      |
| 1-2 drinks per day                   | 2322 (12.0%)       | 479 (10.7%)        | 2052 (10.9%)       | 4853 (11.4%)       |
| 2-3 drinks per day                   | 889 (4.6%)         | 207 (4.6%)         | 791 (4.2%)         | 1887 (4.4%)        |
| 3 or more drinks per day             | 1963 (10.1%)       | 354 (7.9%)         | 1366 (7.2%)        | 3683 (8.6%)        |
| <b>Coffee intake</b>                 |                    |                    |                    |                    |
| None                                 | 2106 (10.9%)       | 572 (12.8%)        | 2398 (12.7%)       | 5076 (11.9%)       |
| Less than 1 cup per day              | 3724 (19.2%)       | 967 (21.6%)        | 3867 (20.5%)       | 8558 (20.0%)       |
| 1 cup per day                        | 4225 (21.8%)       | 856 (19.1%)        | 4195 (22.2%)       | 9276 (21.7%)       |
| 2-3 cups per day                     | 5934 (30.7%)       | 1330 (29.7%)       | 5622 (29.7%)       | 12886 (30.2%)      |
| 4-5 cups per day                     | 2172 (11.2%)       | 528 (11.8%)        | 1947 (10.3%)       | 4647 (10.9%)       |
| 6 or more cups per day               | 1192 (6.2%)        | 218 (4.9%)         | 879 (4.6%)         | 2289 (5.4%)        |
| <b>HEI-2015 quartile</b>             |                    |                    |                    |                    |
| Quartile 1                           | 5880 (30.4%)       | 969 (21.7%)        | 3713 (19.6%)       | 10562 (24.7%)      |
| Quartile 2                           | 5193 (26.8%)       | 1101 (24.6%)       | 4489 (23.7%)       | 10783 (25.2%)      |
| Quartile 3                           | 4539 (23.5%)       | 1156 (25.9%)       | 5090 (26.9%)       | 10785 (25.2%)      |
| Quartile 4                           | 3741 (19.3%)       | 1245 (27.8%)       | 5616 (29.7%)       | 10602 (24.8%)      |
| <b>Marital status</b>                |                    |                    |                    |                    |
| Married or living as married         | 15757 (81.4%)      | 3378 (75.6%)       | 14455 (76.4%)      | 33590 (78.6%)      |
| Divorced or separated                | 1720 (8.9%)        | 598 (13.4%)        | 2133 (11.3%)       | 4451 (10.4%)       |
| Widowed                              | 1297 (6.7%)        | 338 (7.6%)         | 1702 (9.0%)        | 3337 (7.8%)        |
| Never married                        | 579 (3.0%)         | 157 (3.5%)         | 618 (3.3%)         | 1354 (3.2%)        |
| <b>Family history of cancer</b>      | 10798 (55.8%)      | 2541 (56.8%)       | 10760 (56.9%)      | 24099 (56.4%)      |
| <b>Type of multivitamin</b>          |                    |                    |                    |                    |
| Stress- tab/B-complex/Other type     | 0 (0%)             | 926 (20.7%)        | 3171 (16.8%)       | 4097 (9.6%)        |
| Therapeutic or Theragran type        | 0 (0%)             | 276 (6.2%)         | 1611 (8.5%)        | 1887 (4.4%)        |
| One-a-day type                       | 0 (0%)             | 1861 (41.6%)       | 9739 (51.5%)       | 11600 (27.1%)      |
| More than 1 type                     | 0 (0%)             | 1408 (31.5%)       | 4387 (23.2%)       | 5795 (13.6%)       |
| <b>AHS participants</b>              | <b>N=15366</b>     | <b>N=851</b>       | <b>N=3443</b>      | <b>N=19660</b>     |
| Age, median (IQR), y                 | 47.0 (39.0 - 56.0) | 45.0 (37.0 - 55.0) | 48.0 (38.0 - 57.0) | 47.0 (38.0 - 56.0) |
| <b>Sex</b>                           |                    |                    |                    |                    |
| Female                               | 7298 (47.5%)       | 549 (64.5%)        | 2490 (72.3%)       | 10337 (52.6%)      |
| Male                                 | 8068 (52.5%)       | 302 (35.5%)        | 953 (27.7%)        | 9323 (47.4%)       |
| <b>Race/Ethnicity<sup>b</sup></b>    |                    |                    |                    |                    |
| American Indian/Alaskan Native       | 22 (0.1%)          | 1 (0.1%)           | 3 (0.1%)           | 26 (0.1%)          |
| Asian/Pacific Islander               | 4 (0.0%)           | 0 (0.0%)           | 1 (0.0%)           | 5 (0.0%)           |
| Hispanic                             | 115 (0.7%)         | 5 (0.7%)           | 19 (0.6%)          | 139 (0.7%)         |
| Non-Hispanic Black                   | 66 (0.4%)          | 2 (0.3%)           | 9 (0.3%)           | 77 (0.4%)          |
| Non-Hispanic White                   | 15159 (98.7%)      | 843 (99.1%)        | 3411 (99.1%)       | 19413 (98.7%)      |

**eTable 1. Baseline characteristics of study participants by cohort, according to multivitamin use (continued)**

| Characteristic, No. (%) <sup>a</sup> | Nonuse        | Nondaily use | Daily use    | Overall       |
|--------------------------------------|---------------|--------------|--------------|---------------|
| <b>Education</b>                     |               |              |              |               |
| less than 8 years, 8-11 years        | 677 (4.4%)    | 21 (2.5%)    | 116 (3.4%)   | 814 (4.1%)    |
| 12 years, completed high school, GED | 6515 (42.4%)  | 261 (30.7%)  | 1211 (35.2%) | 7987 (40.6%)  |
| post-high school training            | 1735 (11.3%)  | 124 (14.6%)  | 409 (11.9%)  | 2268 (11.5%)  |
| some college                         | 2377 (15.5%)  | 156 (18.3%)  | 587 (17.0%)  | 3120 (15.9%)  |
| college and postgraduate             | 3530 (23.0%)  | 237 (27.8%)  | 881 (25.6%)  | 4648 (23.6%)  |
| other                                | 532 (3.5%)    | 52 (6.1%)    | 239 (6.9%)   | 823 (4.2%)    |
| <b>Smoking status</b>                |               |              |              |               |
| Never smoker                         | 9862 (64.2%)  | 600 (70.5%)  | 2428 (70.5%) | 12890 (65.6%) |
| Former smoker                        | 3855 (25.1%)  | 182 (21.4%)  | 794 (23.1%)  | 4831 (24.6%)  |
| Current smoker                       | 1649 (10.7%)  | 69 (8.1%)    | 221 (6.4%)   | 1939 (9.9%)   |
| <b>Physical activity level</b>       |               |              |              |               |
| Never/Rarely                         | 3265 (21.2%)  | 119 (14.0%)  | 569 (16.5%)  | 3953 (20.1%)  |
| Low (few times a month)              | 2797 (18.2%)  | 166 (19.5%)  | 616 (17.9%)  | 3579 (18.2%)  |
| Moderate (few times a week)          | 2816 (18.3%)  | 181 (21.3%)  | 687 (20.0%)  | 3684 (18.7%)  |
| High (many times a week)             | 6488 (42.2%)  | 385 (45.2%)  | 1571 (45.6%) | 8444 (43.0%)  |
| Individual supplement use            | 5044 (32.8%)  | 505 (59.3%)  | 2037 (59.2%) | 7586 (38.6%)  |
| <b>BMI category</b>                  |               |              |              |               |
| < 18.5 kg/m <sup>2</sup>             | 101 (0.7%)    | 12 (1.4%)    | 50 (1.5%)    | 163 (0.8%)    |
| 18.5 to < 25 kg/m <sup>2</sup>       | 5462 (35.5%)  | 389 (45.7%)  | 1541 (44.8%) | 7392 (37.6%)  |
| 25 to < 30 kg/m <sup>2</sup>         | 6514 (42.4%)  | 312 (36.7%)  | 1320 (38.3%) | 8146 (41.4%)  |
| ≥ 30 kg/m <sup>2</sup>               | 3289 (21.4%)  | 138 (16.2%)  | 532 (15.5%)  | 3959 (20.1%)  |
| <b>Alcohol category</b>              |               |              |              |               |
| 0 drinks per day                     | 5504 (35.8%)  | 278 (32.7%)  | 1310 (38.0%) | 7092 (36.1%)  |
| Less than 1 drink per day            | 8677 (56.5%)  | 519 (61.0%)  | 1962 (57.0%) | 11158 (56.8%) |
| 1-2 drinks per day                   | 851 (5.5%)    | 40 (4.7%)    | 134 (3.9%)   | 1025 (5.2%)   |
| 2-3 drinks per day                   | 244 (1.6%)    | 10 (1.2%)    | 23 (0.7%)    | 277 (1.4%)    |
| 3 or more drinks per day             | 90 (0.6%)     | 4 (0.5%)     | 14 (0.4%)    | 108 (0.5%)    |
| <b>Coffee intake</b>                 |               |              |              |               |
| None                                 | 4543 (29.6%)  | 253 (29.7%)  | 1086 (31.5%) | 5882 (29.9%)  |
| Less than 1 cup per day              | 3140 (20.4%)  | 195 (22.9%)  | 720 (20.9%)  | 4055 (20.6%)  |
| 1 cup per day                        | 2016 (13.1%)  | 100 (11.8%)  | 443 (12.9%)  | 2559 (13.0%)  |
| 2-3 cups per day                     | 3990 (26.0%)  | 214 (25.1%)  | 846 (24.6%)  | 5050 (25.7%)  |
| 4-5 cups per day                     | 1226 (8.0%)   | 68 (8.0%)    | 258 (7.5%)   | 1552 (7.9%)   |
| 6 or more cups per day               | 451 (2.9%)    | 21 (2.5%)    | 90 (2.6%)    | 562 (2.9%)    |
| <b>HEI-2015 quartile</b>             |               |              |              |               |
| Quartile 1                           | 7713 (50.2%)  | 353 (41.5%)  | 1239 (36.0%) | 9305 (47.3%)  |
| Quartile 2                           | 4189 (27.3%)  | 251 (29.5%)  | 1047 (30.4%) | 5487 (27.9%)  |
| Quartile 3                           | 2282 (14.9%)  | 151 (17.7%)  | 692 (20.1%)  | 3125 (15.9%)  |
| Quartile 4                           | 1182 (7.7%)   | 96 (11.3%)   | 465 (13.5%)  | 1743 (8.9%)   |
| <b>Marital status</b>                |               |              |              |               |
| Married or living as married         | 14262 (92.8%) | 792 (93.1%)  | 3296 (95.7%) | 18350 (93.3%) |
| Divorced or separated                | 245 (1.6%)    | 20 (2.4%)    | 32 (0.9%)    | 297 (1.5%)    |
| Widowed                              | 77 (0.5%)     | 6 (0.7%)     | 12 (0.3%)    | 95 (0.5%)     |
| Never married                        | 782 (5.1%)    | 33 (3.9%)    | 103 (3.0%)   | 918 (4.7%)    |
| Family history of cancer             | 7431 (48.4%)  | 410 (48.2%)  | 1720 (50.0%) | 9561 (48.6%)  |

**eTable 1. Baseline characteristics of study participants by cohort, according to multivitamin use (continued)**

| Characteristic, No. (%) <sup>a</sup> | Nonuse | Nondaily use | Daily use    | Overall      |
|--------------------------------------|--------|--------------|--------------|--------------|
| Type of multivitamin                 |        |              |              |              |
| Stress- tab/B-complex/Other          | 0 (0%) | 84 (9.9%)    | 219 (6.4%)   | 303 (1.5%)   |
| Therapeutic or Theragran             | 0 (0%) | 63 (7.4%)    | 266 (7.7%)   | 329 (1.7%)   |
| One-a-day                            | 0 (0%) | 684 (80.4%)  | 2826 (82.1%) | 3510 (17.9%) |
| More than 1 type                     | 0 (0%) | 20 (2.4%)    | 132 (3.8%)   | 152 (0.8%)   |

Abbreviations: HEI-2015 – Healthy Eating Index 2015; BMI – Body Mass Index

<sup>a</sup> Percentages are column percentages.

<sup>b</sup> Race or ethnic group was self-reported.



**eTable 2. Study-specific hazard ratios between multivitamin use and mortality (all-cause and cause-specific)**

| Cause of Death                                 | NIH-AARP                        |                  |                                 |                  | P value for trend |
|------------------------------------------------|---------------------------------|------------------|---------------------------------|------------------|-------------------|
|                                                | Follow-up period 1 <sup>a</sup> |                  | Follow-up period 2 <sup>a</sup> |                  |                   |
|                                                | Nondaily use                    | Daily use        | Nondaily                        | Daily            |                   |
| <b>All-cause mortality</b>                     |                                 |                  |                                 |                  |                   |
| N deaths                                       | 4063                            | 15980            | 12678                           | 47269            |                   |
| Age and sex-adjusted HR (95%CI)                | 1.06 (1.02-1.10)                | 1.00 (0.98-1.02) | 0.92 (0.85-0.99)                | 0.99 (0.94-1.04) | 0.58              |
| Multivariable-adjusted HR (95%CI) <sup>b</sup> | 1.09 (1.05-1.13)                | 1.05 (1.02-1.07) | 0.94 (0.88-1.02)                | 1.03 (0.98-1.08) | <.001             |
| <b>Heart disease mortality</b>                 |                                 |                  |                                 |                  |                   |
| N deaths                                       | 706                             | 3073             | 2701                            | 10458            |                   |
| Age and sex-adjusted HR (95%CI)                | 0.98 (0.90-1.06)                | 1.00 (0.96-1.06) | 0.90 (0.76-1.07)                | 0.99 (0.89-1.10) | 0.80              |
| Multivariable-adjusted HR (95%CI) <sup>b</sup> | 1.02 (0.94-1.11)                | 1.06 (1.01-1.12) | 0.92 (0.78-1.10)                | 1.03 (0.93-1.15) | 0.01              |
| <b>Cancer mortality</b>                        |                                 |                  |                                 |                  |                   |
| N deaths                                       | 1761                            | 6625             | 3454                            | 11923            |                   |
| Age and sex-adjusted HR (95%CI)                | 1.03 (0.98-1.09)                | 0.96 (0.93-0.99) | 0.90 (0.80-1.01)                | 0.94 (0.87-1.01) | 0.01              |
| Multivariable-adjusted HR (95%CI) <sup>b</sup> | 1.06 (1.01-1.12)                | 1.02 (0.98-1.05) | 0.93 (0.83-1.05)                | 0.98 (0.91-1.06) | 0.38              |
| <b>Cerebrovascular diseases mortality</b>      |                                 |                  |                                 |                  |                   |
| N deaths                                       | 162                             | 723              | 761                             | 3000             |                   |
| Age and sex-adjusted HR (95%CI)                | 1.04 (0.87-1.23)                | 1.07 (0.96-1.19) | 0.97 (0.68-1.39)                | 1.07 (0.85-1.33) | 0.21              |
| Multivariable-adjusted HR (95%CI) <sup>b</sup> | 1.02 (0.86-1.21)                | 1.06 (0.95-1.18) | 0.96 (0.67-1.37)                | 1.05 (0.84-1.32) | 0.28              |

| Cause of Death                                 | PLCO                            |                  |                                 |                  | P value for trend |
|------------------------------------------------|---------------------------------|------------------|---------------------------------|------------------|-------------------|
|                                                | Follow-up period 1 <sup>a</sup> |                  | Follow-up period 2 <sup>a</sup> |                  |                   |
|                                                | Nondaily use                    | Daily use        | Nondaily                        | Daily            |                   |
| <b>All-cause mortality</b>                     |                                 |                  |                                 |                  |                   |
| N deaths                                       | 548                             | 2379             | 927                             | 4495             |                   |
| Age and sex-adjusted HR (95%CI)                | 0.96 (0.88-1.06)                | 0.91 (0.86-0.96) | 0.92 (0.75-1.14)                | 1.07 (0.95-1.21) | 0.14              |
| Multivariable-adjusted HR (95%CI) <sup>b</sup> | 1.00 (0.91-1.10)                | 0.95 (0.90-1.01) | 0.95 (0.77-1.18)                | 1.10 (0.97-1.25) | 0.99              |
| <b>Heart disease mortality</b>                 |                                 |                  |                                 |                  |                   |
| N deaths                                       | 104                             | 428              | 188                             | 958              |                   |
| Age and sex-adjusted HR (95%CI)                | 1.04 (0.84-1.29)                | 0.93 (0.82-1.06) | 0.91 (0.57-1.47)                | 1.10 (0.83-1.47) | 0.69              |
| Multivariable-adjusted HR (95%CI) <sup>b</sup> | 1.13 (0.91-1.40)                | 0.99 (0.86-1.14) | 0.96 (0.59-1.55)                | 1.15 (0.86-1.54) | 0.65              |

**eTable 2. Study-specific hazard ratios between multivitamin use and mortality (all-cause and cause-specific) (continued)**

| PLCO (continued)                               | Follow-up period 1 <sup>a</sup> |                  | Follow-up period 2 <sup>a</sup> |                  | P value for trend |
|------------------------------------------------|---------------------------------|------------------|---------------------------------|------------------|-------------------|
|                                                |                                 |                  |                                 |                  |                   |
| <b>Cancer mortality</b>                        |                                 |                  |                                 |                  |                   |
| N deaths                                       | 211                             | 955              | 217                             | 966              |                   |
| Age and sex-adjusted HR (95%CI)                | 0.87 (0.75-1.01)                | 0.89 (0.82-0.97) | 0.87 (0.61-1.24)                | 0.96 (0.78-1.19) | 0.11              |
| Multivariable-adjusted HR (95%CI) <sup>b</sup> | 0.90 (0.77-1.04)                | 0.93 (0.84-1.02) | 0.90 (0.63-1.29)                | 0.99 (0.80-1.23) | 0.61              |
| <b>Cerebrovascular diseases mortality</b>      |                                 |                  |                                 |                  |                   |
| N deaths                                       | 27                              | 117              | 69                              | 304              |                   |
| Age and sex-adjusted HR (95%CI)                | 0.97 (0.64-1.47)                | 0.87 (0.68-1.13) | 1.11 (0.45-2.75)                | 1.13 (0.65-1.96) | 0.26              |
| Multivariable-adjusted HR (95%CI) <sup>b</sup> | 0.99 (0.65-1.52)                | 0.91 (0.70-1.18) | 1.14 (0.45-2.84)                | 1.14 (0.65-2.00) | 0.34              |

| Cause of Death                                 | AHS                             |                  |                                 |                  | P value for trend |
|------------------------------------------------|---------------------------------|------------------|---------------------------------|------------------|-------------------|
|                                                | Follow-up period 1 <sup>a</sup> |                  | Follow-up period 2 <sup>a</sup> |                  |                   |
|                                                | Nondaily use                    | Daily use        | Nondaily                        | Daily            |                   |
| <b>All-cause mortality</b>                     |                                 |                  |                                 |                  |                   |
| N deaths                                       | 25                              | 102              | 86                              | 452              |                   |
| Age and sex-adjusted HR (95%CI)                | 1.08 (0.72-1.63)                | 0.97 (0.78-1.21) | 0.85 (0.36-2.02)                | 1.00 (0.63-1.58) | 0.83              |
| Multivariable-adjusted HR (95%CI) <sup>b</sup> | 1.04 (0.69-1.56)                | 1.18 (0.95-1.48) | 0.92 (0.38-2.21)                | 1.08 (0.67-1.72) | 0.12              |
| <b>Heart disease mortality</b>                 |                                 |                  |                                 |                  |                   |
| N deaths                                       | 3                               | 27               | 17                              | 87               |                   |
| Age and sex-adjusted HR (95%CI)                | Did not converge                | 1.12 (0.73-1.72) | Did not converge                | 0.92 (0.37-2.30) | 0.53              |
| Multivariable-adjusted HR (95%CI) <sup>b</sup> | Did not converge                | 1.54 (0.98-2.40) | Did not converge                | 0.98 (0.38-2.51) | <.001             |
| <b>Cancer mortality</b>                        |                                 |                  |                                 |                  |                   |
| N deaths                                       | 13                              | 41               | 29                              | 137              |                   |
| Age and sex-adjusted HR (95%CI)                | 1.35 (0.77-2.38)                | 0.99 (0.70-1.39) | 0.92 (0.27-3.20)                | 1.03 (0.49-2.13) | 0.99              |
| Multivariable-adjusted HR (95%CI) <sup>b</sup> | 1.46 (0.82-2.60)                | 1.17 (0.83-1.67) | 1.00 (0.28-3.55)                | 1.10 (0.52-2.31) | 0.32              |
| <b>Cerebrovascular diseases mortality</b>      |                                 |                  |                                 |                  |                   |
| N deaths                                       | 1                               | 10               | 5                               | 24               |                   |
| Age and sex-adjusted HR (95%CI)                | Did not converge                | 1.69 (0.78-3.68) | Did not converge                | 0.86 (0.16-4.51) | 0.002             |
| Multivariable-adjusted HR (95%CI) <sup>b</sup> | Did not converge                | 2.16 (0.96-4.87) | Did not converge                | 0.92 (0.16-5.14) | <.001             |

## eTable 2. Study-specific hazard ratios between multivitamin use and mortality (all-cause and cause-specific) (continued)

<sup>a</sup> The proportional hazards assumption was violated ( $P < .001$ ). Therefore, follow-up time was stratified by the midpoint, and hazard ratios were calculated using an interaction term between follow-up period and the exposure variable. **NIH-AARP**: Maximum follow-up time was 24 years; follow-up period 1 was the first 12 years of follow-up and follow-up period 2 was the last 12 years of follow-up. **PLCO**: Maximum follow-up was 27 years; follow-up period 1 was the first 12 years of follow-up and follow-up period 2 was the last 15 years of follow-up. **AHS**: Maximum follow-up was 26 years; follow-up period 1 was the first 12 years of follow-up and follow-up period 2 was the last 14 years of follow-up.

<sup>b</sup> Models were adjusted for sex (male or female), age at enrollment (years), race/ethnicity (American Indian/Alaskan Native, Asian/Pacific Islander, Hispanic, Non-Hispanic Black, or Non-Hispanic White), education (11 years or less; 12 years, completed high school or GED; post high school training; some college; college and postgraduate; or other), body mass index category ( $< 18.5 \text{ kg/m}^2$ ,  $18.5$  to  $<25 \text{ kg/m}^2$ ,  $25$  to  $<30 \text{ kg/m}^2$ ,  $30+$   $\text{kg/m}^2$ ), marital status (married or living as married, divorced or separated, widowed, or never married), smoking status (never smoker, former smoker, current smoker  $\leq 20$  cigarettes/day, current smoker 21-40 cigarettes/day, or current smoker  $> 40$  cigarettes/day), alcohol consumption (0 drinks per day,  $< 1$  drink/day, 1 to  $<2$  drinks/day, 2 to  $<3$  drinks/day, 3 or more drinks/day), physical activity level (never, low: few times a month, moderate: few times per week, high: many times a week), coffee intake (0 cups/day,  $<1$  cup/day, 2-3 cups/day, 4-5 cups/day, or 6+ cups/day), family history of cancer (yes or no), Healthy Eating Index 2015 (HEI-2015) quartile (**NIH-AARP**: Quartile 1: 21.5 to  $<61.5$ , Quartile 2: 61.5 to  $<68.6$ , Quartile 3: 68.6 to  $<74.7$ , Quartile 4: 74.7 to 98; **PLCO**: Quartile 1: 28.5 to  $<60.8$ , Quartile 2: 60.8 to  $<67.3$ , Quartile 3: 67.3 to  $<73.1$ , Quartile 4: 73.1 to 95; **AHS**: Quartile 1: 21.9 to  $<55.3$ , Quartile 2: 55.3 to  $<61.8$ , Quartile 3: 61.8 to  $<68.2$ , Quartile 4: 68.2 to 95), and use of individual supplements (yes or no). CI denotes confidence intervals and numbers represent hazard ratios and 95% confidence intervals for daily multivitamin users and nondaily users in adjusted models.

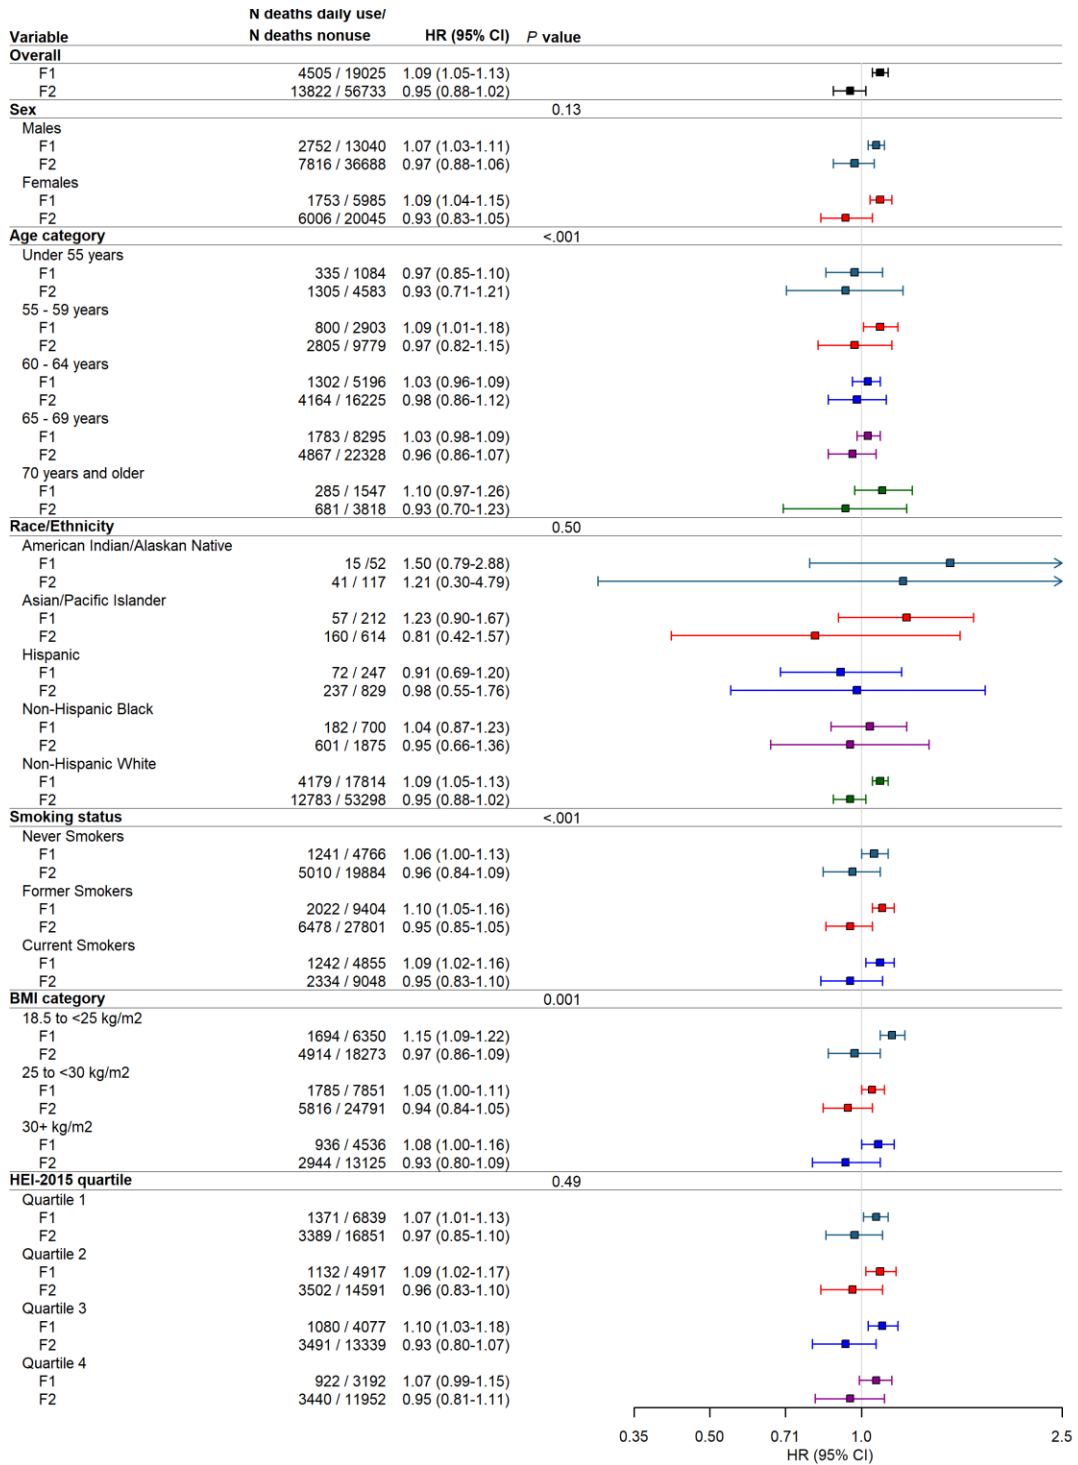

**eFigure 2. Forest plot of stratified baseline estimates for the association of nondaily multivitamin use and all-cause mortality, N=390,124**

Abbreviations: Follow-up period 1 (F1); Follow-up period 2 (F2); Body Mass Index (BMI); Healthy Eating Index-2015 (HEI-2015)

The proportional hazards assumption was violated ( $P<.001$ ). Therefore, follow-up time was stratified by the midpoint, and hazard ratios were calculated using an interaction term between follow-up period and the exposure variable. Maximum follow-up time was

24 years for the AARP cohort, 27 years for the PLCO cohort, and 26 years for the AHS cohort; follow-up period 1 (F1) was the first 12 years of follow-up and follow-up period 2 (F2) was the last 15 years of follow-up.

*P* value represents significance of likelihood ratio test for each effect modifier.

Models were stratified by study and adjusted for sex (male or female), age at enrollment (years), race/ethnicity (American Indian/Alaskan Native, Asian/Pacific Islander, Hispanic, Non-Hispanic Black, or Non-Hispanic White), education (11 years or less; 12 years, completed high school or GED; post high school training; some college; college and postgraduate; or other), body mass index category (< 18.5 kg/m<sup>2</sup>, 18.5 to <25 kg/m<sup>2</sup>, 25 to <30 kg/m<sup>2</sup>, 30+ kg/m<sup>2</sup>), marital status (married or living as married, divorced or separated, widowed, or never married), smoking status (never smoker, former smoker, current smoker ≤20 cigarettes/day, current smoker 21-40 cigarettes/day, or current smoker > 40 cigarettes/day), alcohol consumption (0 drinks per day, < 1 drink/day, 1 to <2 drinks/day, 2 to <3 drinks/day, 3 or more drinks/day), physical activity level (never, low: few times a month, moderate: few times per week, high: many times a week), coffee intake (0 cups/day, <1 cup/day, 2-3 cups/day, 4-5 cups/day, or 6+ cups/day), family history of cancer (yes or no), Healthy Eating Index 2015 (HEI-2015) quartile (Quartile 1: 21.55 to <60.90, Quartile 2: 60.90 to <68.00, Quartile 3: 68.00 to <74.20, Quartile 4: 74.20 to <96.10), and use of individual supplements (yes or no).

**eTable 3. Baseline characteristics of time-varying analysis participants by cohort, according to multivitamin use**

| Characteristic, No. (%)              | Nonuse<br>N=76010 | Nondaily use<br>N=21922 | Daily use<br>N=74564 | P     | Overall<br>N=172496 |
|--------------------------------------|-------------------|-------------------------|----------------------|-------|---------------------|
| <b>AARP participants</b>             |                   |                         |                      |       |                     |
| Age, median (IQR), y                 | 62.3 (57.9-66.7)  | 60.9 (52.0-69.8)        | 62.4 (53.6-71.2)     | <.001 | 62.1 (57.7-66.5)    |
| Sex                                  |                   |                         |                      | <.001 |                     |
| Female                               | 28410 (37.4%)     | 10294 (47.0%)           | 35013 (47.0%)        |       | 73717 (42.7%)       |
| Male                                 | 47600 (62.6%)     | 11628 (53.0%)           | 39551 (53.0%)        |       | 98779 (57.3%)       |
| Race/Ethnicity <sup>a</sup>          |                   |                         |                      | <.001 |                     |
| American Indian/Alaskan Native       | 144 (0.2%)        | 48 (0.2%)               | 146 (0.2%)           |       | 338 (0.2%)          |
| Asian/Pacific Islander               | 935 (1.2%)        | 329 (1.5%)              | 825 (1.1%)           |       | 2089 (1.2%)         |
| Hispanic                             | 1152 (1.5%)       | 400 (1.8%)              | 1089 (1.5%)          |       | 2641 (1.5%)         |
| Non-Hispanic Black                   | 2307 (3.0%)       | 802 (3.7%)              | 1780 (2.4%)          |       | 4889 (2.8%)         |
| Non-Hispanic White                   | 71472 (94.0%)     | 20343 (92.8%)           | 70724 (94.9%)        |       | 162539 (94.2%)      |
| Education                            |                   |                         |                      | <.001 |                     |
| less than 8 years, 8-11 years        | 3569 (4.7%)       | 728 (3.3%)              | 2491 (3.3%)          |       | 6788 (3.9%)         |
| 12 years, completed high school, GED | 14898 (19.6%)     | 3417 (15.6%)            | 12776 (17.1%)        |       | 31091 (18.0%)       |
| post-high school training            | 7625 (10.0%)      | 2116 (9.7%)             | 7220 (9.7%)          |       | 16961 (9.8%)        |
| some college                         | 17175 (22.6%)     | 5371 (24.5%)            | 17850 (23.9%)        |       | 40396 (23.4%)       |
| college and postgraduate             | 32743 (43.1%)     | 10290 (46.9%)           | 34227 (45.9%)        |       | 77260 (44.8%)       |
| Smoking status                       |                   |                         |                      | <.001 |                     |
| Never smoker                         | 29146 (38.3%)     | 8931 (40.7%)            | 28962 (38.8%)        |       | 67039 (38.9%)       |
| Former smoker                        | 36995 (48.7%)     | 10066 (45.9%)           | 37214 (49.9%)        |       | 84275 (48.9%)       |
| Current smoker                       | 9869 (13.0%)      | 2925 (13.3%)            | 8388 (11.2%)         |       | 21182 (12.3%)       |
| Physical activity level              |                   |                         |                      | <.001 |                     |
| Never/Rarely                         | 13905 (18.3%)     | 3326 (15.2%)            | 10858 (14.6%)        |       | 28089 (16.3%)       |
| Low (few times a month)              | 11311 (14.9%)     | 3607 (16.5%)            | 9436 (12.7%)         |       | 24354 (14.1%)       |
| Moderate (few times per week)        | 17211 (22.6%)     | 5725 (26.1%)            | 16164 (21.7%)        |       | 39100 (22.7%)       |
| High (many times a week)             | 33583 (44.2%)     | 9264 (42.3%)            | 38106 (51.1%)        |       | 80953 (46.9%)       |
| Individual supplement use            | 26754 (35.2%)     | 17755 (81.0%)           | 63151 (84.7%)        | <.001 | 107660 (62.4%)      |
| BMI category                         |                   |                         |                      | <.001 |                     |
| < 18.5 kg/m <sup>2</sup>             | 761 (1.0%)        | 254 (1.2%)              | 911 (1.2%)           |       | 1926 (1.1%)         |
| 18.5 to < 25 kg/m <sup>2</sup>       | 26734 (35.2%)     | 8306 (37.9%)            | 30352 (40.7%)        |       | 65392 (37.9%)       |
| 25 to < 30 kg/m <sup>2</sup>         | 32773 (43.1%)     | 9183 (41.9%)            | 30375 (40.7%)        |       | 72331 (41.9%)       |
| ≥ 30 kg/m <sup>2</sup>               | 15742 (20.7%)     | 4179 (19.1%)            | 12926 (17.3%)        |       | 32847 (19.0%)       |
| Alcohol category                     |                   |                         |                      | <.001 |                     |
| 0 drinks per day                     | 15708 (20.7%)     | 3827 (17.5%)            | 14958 (20.1%)        |       | 34493 (20.0%)       |
| Less than 1 drink per day            | 40429 (53.2%)     | 12999 (59.3%)           | 41428 (55.6%)        |       | 94856 (55.0%)       |
| 1-2 drinks per day                   | 10025 (13.2%)     | 2685 (12.2%)            | 9658 (13.0%)         |       | 22368 (13.0%)       |
| 2-3 drinks per day                   | 3128 (4.1%)       | 804 (3.7%)              | 3038 (4.1%)          |       | 6970 (4.0%)         |
| 3 or more drinks per day             | 6720 (8.8%)       | 1607 (7.3%)             | 5482 (7.4%)          |       | 13809 (8.0%)        |
| Coffee intake, n (%)                 |                   |                         |                      | <.001 |                     |
| None                                 | 8111 (10.7%)      | 2056 (9.4%)             | 8156 (10.9%)         |       | 18323 (10.6%)       |
| Less than 1 cup per day              | 11469 (15.1%)     | 3592 (16.4%)            | 12294 (16.5%)        |       | 27355 (15.9%)       |
| 1 cup per day                        | 11907 (15.7%)     | 3225 (14.7%)            | 11990 (16.1%)        |       | 27122 (15.7%)       |
| 2-3 cups per day                     | 31848 (41.9%)     | 9330 (42.6%)            | 30653 (41.1%)        |       | 71831 (41.6%)       |
| 4-5 cups per day                     | 9730 (12.8%)      | 2894 (13.2%)            | 8882 (11.9%)         |       | 21506 (12.5%)       |
| 6 or more cups per day               | 2945 (3.9%)       | 825 (3.8%)              | 2589 (3.5%)          |       | 6359 (3.7%)         |

**eTable 3. Baseline characteristics of time-varying analysis participants by cohort, according to multivitamin use (continued)**

| Characteristic (AARP continued)      | Nonuse             | Nondaily use       | Daily use          | P     | Overall            |
|--------------------------------------|--------------------|--------------------|--------------------|-------|--------------------|
| HEI-2015 quartile                    |                    |                    |                    | <.001 |                    |
| Quartile 1                           | 22229 (29.2%)      | 5374 (24.5%)       | 15159 (20.3%)      |       | 42762 (24.8%)      |
| Quartile 2                           | 19581 (25.8%)      | 5624 (25.7%)       | 17746 (23.8%)      |       | 42951 (24.9%)      |
| Quartile 3                           | 18042 (23.7%)      | 5593 (25.5%)       | 19755 (26.5%)      |       | 43390 (25.2%)      |
| Quartile 4                           | 16158 (21.3%)      | 5331 (24.3%)       | 21904 (29.4%)      |       | 43393 (25.2%)      |
| Marital status                       |                    |                    |                    | <.001 |                    |
| Married or living as married         | 55052 (72.4%)      | 14630 (66.7%)      | 49106 (65.9%)      |       | 118788 (68.9%)     |
| Divorced or separated                | 9820 (12.9%)       | 3897 (17.8%)       | 12500 (16.8%)      |       | 26217 (15.2%)      |
| Widowed                              | 7217 (9.5%)        | 2268 (10.3%)       | 8703 (11.7%)       |       | 18188 (10.5%)      |
| Never married                        | 3921 (5.2%)        | 1127 (5.1%)        | 4255 (5.7%)        |       | 9303 (5.4%)        |
| Family history of cancer             | 39878 (52.5%)      | 11554 (52.7%)      | 39173 (52.5%)      | <.001 | 90605 (52.5%)      |
| <b>PLCO participants</b>             | <b>N=19353</b>     | <b>N=4471</b>      | <b>N=18908</b>     |       | <b>N=42732</b>     |
| Age, median (IQR), y                 | 62.0 (58.0 - 66.0) | 61.0 (57.0 - 65.0) | 62.0 (58.0 - 66.0) | <.001 | 62.0 (58.0 - 66.0) |
| Sex                                  |                    |                    |                    | <.001 |                    |
| Female                               | 8187 (42.3%)       | 2503 (56.0%)       | 11414 (60.4%)      |       | 22104 (51.7%)      |
| Male                                 | 11166 (57.7%)      | 1968 (44.0%)       | 7494 (39.6%)       |       | 20628 (48.3%)      |
| Race/Ethnicity <sup>a</sup>          |                    |                    |                    | <.001 |                    |
| American Indian/Alaskan Native       | 33 (0.2%)          | 13 (0.3%)          | 36 (0.2%)          |       | 82 (0.2%)          |
| Asian/Pacific Islander               | 599 (3.1%)         | 175 (3.9%)         | 674 (3.6%)         |       | 1448 (3.4%)        |
| Hispanic                             | 241 (1.2%)         | 59 (1.3%)          | 267 (1.4%)         |       | 567 (1.3%)         |
| Non-Hispanic Black                   | 676 (3.5%)         | 135 (3.0%)         | 500 (2.6%)         |       | 1311 (3.1%)        |
| Non-Hispanic White                   | 17804 (92.0%)      | 4089 (91.5%)       | 17431 (92.2%)      |       | 39324 (92.0%)      |
| Education                            |                    |                    |                    | <.001 |                    |
| less than 8 years, 8-11 years        | 1322 (6.8%)        | 173 (3.9%)         | 949 (5.0%)         |       | 2444 (5.7%)        |
| 12 years, completed high school, GED | 4735 (24.5%)       | 821 (18.4%)        | 4236 (22.4%)       |       | 9792 (22.9%)       |
| post-high school training            | 2411 (12.5%)       | 529 (11.8%)        | 2372 (12.5%)       |       | 5312 (12.4%)       |
| some college                         | 3948 (20.4%)       | 991 (22.2%)        | 4176 (22.1%)       |       | 9115 (21.3%)       |
| college and postgraduate             | 6937 (35.8%)       | 1957 (43.8%)       | 7175 (37.9%)       |       | 16069 (37.6%)      |
| Smoking status                       |                    |                    |                    | <.001 |                    |
| Never smoker                         | 9114 (47.1%)       | 2284 (51.1%)       | 9321 (49.3%)       |       | 20719 (48.5%)      |
| Former smoker                        | 8177 (42.3%)       | 1754 (39.2%)       | 7963 (42.1%)       |       | 17894 (41.9%)      |
| Current smoker                       | 2062 (10.7%)       | 433 (9.7%)         | 1624 (8.6%)        |       | 4119 (9.6%)        |
| Physical activity level              |                    |                    |                    | <.001 |                    |
| Never/Rarely                         | 3245 (16.8%)       | 466 (10.4%)        | 2420 (12.8%)       |       | 6131 (14.3%)       |
| Low (few times a month)              | 3660 (18.9%)       | 874 (19.5%)        | 3108 (16.4%)       |       | 7642 (17.9%)       |
| Moderate (few times per week)        | 5366 (27.7%)       | 1358 (30.4%)       | 5387 (28.5%)       |       | 12111 (28.3%)      |
| High (many times a week)             | 7082 (36.6%)       | 1773 (39.7%)       | 7993 (42.3%)       |       | 16848 (39.4%)      |
| Individual supplement use            | 6554 (33.9%)       | 3638 (81.4%)       | 15398 (81.4%)      | <.001 | 25590 (59.9%)      |
| BMI category                         |                    |                    |                    | <.001 |                    |
| < 18.5 kg/m <sup>2</sup>             | 105 (0.5%)         | 31 (0.7%)          | 159 (0.8%)         |       | 295 (0.7%)         |
| 18.5 to < 25 kg/m <sup>2</sup>       | 6111 (31.6%)       | 1751 (39.2%)       | 7255 (38.4%)       |       | 15117 (35.4%)      |
| 25 to < 30 kg/m <sup>2</sup>         | 8682 (44.9%)       | 1817 (40.6%)       | 7713 (40.8%)       |       | 18212 (42.6%)      |
| ≥ 30 kg/m <sup>2</sup>               | 4455 (23.0%)       | 872 (19.5%)        | 3781 (20.0%)       |       | 9108 (21.3%)       |

**eTable 3. Baseline characteristics of time-varying analysis participants by cohort, according to multivitamin use (continued)**

| Characteristic (PLCO continued)         | Nonuse           | Nondaily use     | Daily use        | P     | Overall          |
|-----------------------------------------|------------------|------------------|------------------|-------|------------------|
| Alcohol category                        |                  |                  |                  | <.001 |                  |
| 0 drinks per day                        | 3810 (19.7%)     | 878 (19.6%)      | 4188 (22.1%)     |       | 8876 (20.8%)     |
| Less than 1 drink per day               | 10369 (53.6%)    | 2553 (57.1%)     | 10511 (55.6%)    |       | 23433 (54.8%)    |
| 1-2 drinks per day                      | 2322 (12.0%)     | 479 (10.7%)      | 2052 (10.9%)     |       | 4853 (11.4%)     |
| 2-3 drinks per day                      | 889 (4.6%)       | 207 (4.6%)       | 791 (4.2%)       |       | 1887 (4.4%)      |
| 3 or more drinks per day                | 1963 (10.1%)     | 354 (7.9%)       | 1366 (7.2%)      |       | 3683 (8.6%)      |
| Coffee intake                           |                  |                  |                  | <.001 |                  |
| None                                    | 2106 (10.9%)     | 572 (12.8%)      | 2398 (12.7%)     |       | 5076 (11.9%)     |
| Less than 1 cup per day                 | 3724 (19.2%)     | 967 (21.6%)      | 3867 (20.5%)     |       | 8558 (20.0%)     |
| 1 cup per day                           | 4225 (21.8%)     | 856 (19.1%)      | 4195 (22.2%)     |       | 9276 (21.7%)     |
| 2-3 cups per day                        | 5934 (30.7%)     | 1330 (29.7%)     | 5622 (29.7%)     |       | 12886 (30.2%)    |
| 4-5 cups per day                        | 2172 (11.2%)     | 528 (11.8%)      | 1947 (10.3%)     |       | 4647 (10.9%)     |
| 6 or more cups per day                  | 1192 (6.2%)      | 218 (4.9%)       | 879 (4.6%)       |       | 2289 (5.4%)      |
| HEI-2015 quartile                       |                  |                  |                  | <.001 |                  |
| Quartile 1                              | 5880 (30.4%)     | 969 (21.7%)      | 3713 (19.6%)     |       | 10562 (24.7%)    |
| Quartile 2                              | 5193 (26.8%)     | 1101 (24.6%)     | 4489 (23.7%)     |       | 10783 (25.2%)    |
| Quartile 3                              | 4539 (23.5%)     | 1156 (25.9%)     | 5090 (26.9%)     |       | 10785 (25.2%)    |
| Quartile 4                              | 3741 (19.3%)     | 1245 (27.8%)     | 5616 (29.7%)     |       | 10602 (24.8%)    |
| Marital status                          |                  |                  |                  | <.001 |                  |
| Married or living as married            | 15757 (81.4%)    | 3378 (75.6%)     | 14455 (76.4%)    |       | 33590 (78.6%)    |
| Divorced or separated                   | 1720 (8.9%)      | 598 (13.4%)      | 2133 (11.3%)     |       | 4451 (10.4%)     |
| Widowed                                 | 1297 (6.7%)      | 338 (7.6%)       | 1702 (9.0%)      |       | 3337 (7.8%)      |
| Never married                           | 579 (3.0%)       | 157 (3.5%)       | 618 (3.3%)       |       | 1354 (3.2%)      |
| Family history of cancer                | 10798 (55.8%)    | 2541 (56.8%)     | 10760 (56.9%)    | 0.074 | 24099 (56.4%)    |
| <b>AHS participants</b>                 | <b>N=15132</b>   | <b>N=839</b>     | <b>N=3394</b>    |       | <b>N=19365</b>   |
| Age, median (IQR), y                    | 46.0 (38.0-56.0) | 45.0 (37.0-55.0) | 48.0 (38.0-57.0) | <.001 | 47.0 (38.0-56.0) |
| Sex                                     |                  |                  |                  | <.001 |                  |
| Female                                  | 7207 (47.6%)     | 545 (65.0%)      | 2458 (72.4%)     |       | 10210 (52.7%)    |
| Male                                    | 7925 (52.4%)     | 294 (35.0%)      | 936 (27.6%)      |       | 9155 (47.3%)     |
| Race/Ethnicity <sup>a</sup>             |                  |                  |                  | 0.46  |                  |
| American Indian/Alaskan Native          | 4 (0.0%)         | 0 (0%)           | 3 (0.1%)         |       | 26 (0.1%)        |
| Asian/Pacific Islander                  | 22 (0.1%)        | 1 (0.1%)         | 1 (0.0%)         |       | 5 (0.0%)         |
| Hispanic                                | 112 (0.7%)       | 5 (0.6%)         | 19 (0.6%)        |       | 136 (0.7%)       |
| Non-Hispanic Black                      | 64 (0.4%)        | 2 (0.2%)         | 9 (0.3%)         |       | 75 (0.4%)        |
| Non-Hispanic White                      | 14930 (98.7%)    | 831 (99.0%)      | 3362 (99.1%)     |       | 19123 (98.8%)    |
| Education                               |                  |                  |                  | <.001 |                  |
| less than 8 years, 8-11 years           | 656 (4.3%)       | 20 (2.4%)        | 112 (3.3%)       |       | 788 (4.1%)       |
| 12 years, completed high school, or GED | 6401 (42.3%)     | 256 (30.5%)      | 1194 (35.2%)     |       | 7851 (40.5%)     |
| post-high school training               | 1711 (11.3%)     | 123 (14.7%)      | 404 (11.9%)      |       | 2238 (11.6%)     |
| Some college                            | 2352 (15.5%)     | 154 (18.4%)      | 577 (17.0%)      |       | 3083 (15.9%)     |
| College and postgraduate                | 3487 (23.0%)     | 234 (27.9%)      | 872 (25.7%)      |       | 4593 (23.7%)     |
| Other                                   | 525 (3.5%)       | 52 (6.2%)        | 235 (6.9%)       |       | 812 (4.2%)       |
| Smoking status                          |                  |                  |                  | <.001 |                  |
| Never smoker                            | 9721 (64.2%)     | 595 (70.9%)      | 2398 (70.7%)     |       | 12714 (65.7%)    |
| Former smoker                           | 3791 (25.1%)     | 178 (21.2%)      | 779 (23.0%)      |       | 4748 (24.5%)     |
| Current smoker                          | 1620 (10.7%)     | 66 (7.9%)        | 217 (6.4%)       |       | 1903 (9.8%)      |



**eTable 3. Baseline characteristics of time-varying analysis participants by cohort, according to multivitamin use (continued)**

| Characteristic (AHS continued) | Nonuse        | Nondaily use | Daily use    | P     | Overall       |
|--------------------------------|---------------|--------------|--------------|-------|---------------|
| Physical activity level        |               |              |              | <.001 |               |
| Never                          | 3209 (21.2%)  | 118 (14.1%)  | 556 (16.4%)  |       | 3883 (20.1%)  |
| Low (few times a month)        | 2758 (18.2%)  | 164 (19.5%)  | 604 (17.8%)  |       | 3526 (18.2%)  |
| Moderate (few times per week)  | 2775 (18.3%)  | 180 (21.5%)  | 680 (20.0%)  |       | 3635 (18.8%)  |
| High (many times a week)       | 6390 (42.2%)  | 377 (44.9%)  | 1554 (45.8%) |       | 8321 (43.0%)  |
| Individual supplement use      | 4970 (32.8%)  | 499 (59.5%)  | 2003 (59.0%) | <.001 | 7472 (38.6%)  |
| BMI category                   |               |              |              | <.001 |               |
| < 18.5 kg/m <sup>2</sup>       | 100 (0.7%)    | 12 (1.4%)    | 50 (1.5%)    |       | 162 (0.8%)    |
| 18.5 to < 25 kg/m <sup>2</sup> | 5384 (35.6%)  | 387 (46.1%)  | 1522 (44.8%) |       | 7293 (37.7%)  |
| 25 to < 30 kg/m <sup>2</sup>   | 6415 (42.4%)  | 302 (36.0%)  | 1299 (38.3%) |       | 8016 (41.4%)  |
| ≥ 30 kg/m <sup>2</sup>         | 3233 (21.4%)  | 138 (16.4%)  | 523 (15.4%)  |       | 3894 (20.1%)  |
| Alcohol category               |               |              |              | <.001 |               |
| 0 drinks per day               | 5410 (35.8%)  | 276 (32.9%)  | 1287 (37.9%) |       | 6973 (36.0%)  |
| Less than 1 drink per day      | 8554 (56.5%)  | 511 (60.9%)  | 1940 (57.2%) |       | 11005 (56.8%) |
| 1-2 drinks per day             | 836 (5.5%)    | 38 (4.5%)    | 133 (3.9%)   |       | 1007 (5.2%)   |
| 2-3 drinks per day             | 242 (1.6%)    | 10 (1.2%)    | 22 (0.6%)    |       | 274 (1.4%)    |
| 3 or more drinks per day       | 90 (0.6%)     | 4 (0.5%)     | 12 (0.4%)    |       | 106 (0.5%)    |
| Coffee intake                  |               |              |              | 0.002 |               |
| None                           | 4485 (29.6%)  | 252 (30.0%)  | 1076 (31.7%) |       | 5813 (30.0%)  |
| Less than 1 cup per day        | 3099 (20.5%)  | 194 (23.1%)  | 713 (21.0%)  |       | 4006 (20.7%)  |
| 1 cup per day                  | 1982 (13.1%)  | 100 (11.9%)  | 435 (12.8%)  |       | 2517 (13.0%)  |
| 2-3 cups per day               | 3912 (25.9%)  | 206 (24.6%)  | 828 (24.4%)  |       | 4946 (25.5%)  |
| 4-5 cups per day               | 1205 (8.0%)   | 68 (8.1%)    | 252 (7.4%)   |       | 1525 (7.9%)   |
| 6 or more cups per day         | 449 (3.0%)    | 19 (2.3%)    | 90 (2.7%)    |       | 558 (2.9%)    |
| HEI-2015 quartile              |               |              |              | <.001 |               |
| Quartile 1                     | 4217 (27.9%)  | 159 (19.0%)  | 605 (17.8%)  |       | 4981 (25.7%)  |
| Quartile 2                     | 3942 (26.1%)  | 222 (26.5%)  | 742 (21.9%)  |       | 4906 (25.3%)  |
| Quartile 3                     | 3692 (24.4%)  | 219 (26.1%)  | 937 (27.6%)  |       | 4848 (25.0%)  |
| Quartile 4                     | 3281 (21.7%)  | 239 (28.5%)  | 1110 (32.7%) |       | 4630 (23.9%)  |
| Marital status                 |               |              |              | <.001 |               |
| Married or living as married   | 14041 (92.8%) | 783 (93.3%)  | 3248 (95.7%) |       | 18072 (93.3%) |
| Divorced or separated          | 239 (1.6%)    | 19 (2.3%)    | 32 (0.9%)    |       | 290 (1.5%)    |
| Widowed                        | 75 (0.5%)     | 6 (0.7%)     | 12 (0.4%)    |       | 93 (0.5%)     |
| Never married                  | 777 (5.1%)    | 31 (3.7%)    | 102 (3.0%)   |       | 910 (4.7%)    |
| Family history of cancer       | 7310 (48.3%)  | 403 (48.0%)  | 1694 (49.9%) | 0.071 | 9407 (48.6%)  |

Abbreviations: HEI-2015 – Healthy Eating Index 2015; BMI – Body Mass Index

<sup>a</sup> Race or ethnic group was self-reported.
