# Supplementary material for: Multivitamin Use and Mortality Risk in 3 Prospective US Cohorts
Source: PubMed Central journal article supplement (PMC11208972; doi:10.1001/jamanetworkopen.2024.18729), 2024-06-26
Supplement: jamanetwopen-e2418729-s002.pdf [file jamanetwopen-e2418729-s002.pdf]

# Data Sharing Statement

Lofffield. Multivitamin Use and Mortality Risk in 3 Prospective US Cohorts. *JAMA Netw Open*. Published June 26, 2024. doi:10.1001/jamanetworkopen.2024.18729

## Data

**Data available:** Yes

**Data types:** Deidentified participant data, Data dictionary

**How to access data:** Data can be obtained on request. Requests should be directed to the NIH-AARP Diet and Health Study (<https://dietandhealth.cancer.gov/>), PLCO Trial (<https://cdas.cancer.gov/plco/>), and Agricultural Health Study (<https://aghealth.nih.gov/collaboration/process.html>), which all have a protocol for approving data requests. Study resources, including data dictionaries and information on questionnaires, are available at the study websites cited above.

**When available:** With publication

## Supporting Documents

**Document types:** Statistical/analytic code

**How to access documents:** Requests for complete code can be sent to [erikka.loftfield@nih.gov](mailto:erikka.loftfield@nih.gov).

**When available:** With publication

## Additional Information

**Who can access the data:** Data will be shared with researchers whose proposed use of the data has been approved

**Types of analyses:** Data will be shared for research purposes

**Mechanisms of data availability:** Data will be made available after approval of proposal and signed data access agreement
